# Supplementary material for: Programmable multispecific DNA-origami-based T-cell engagers
Source: PubMed Central journal article supplement (PMC10656288; doi:10.1038/s41565-023-01471-7), 2023-08-17

**Source Data Figure 1 to 4**

**Source Data Figure 1a:**

Single Particle library of class averages.

Without IgG

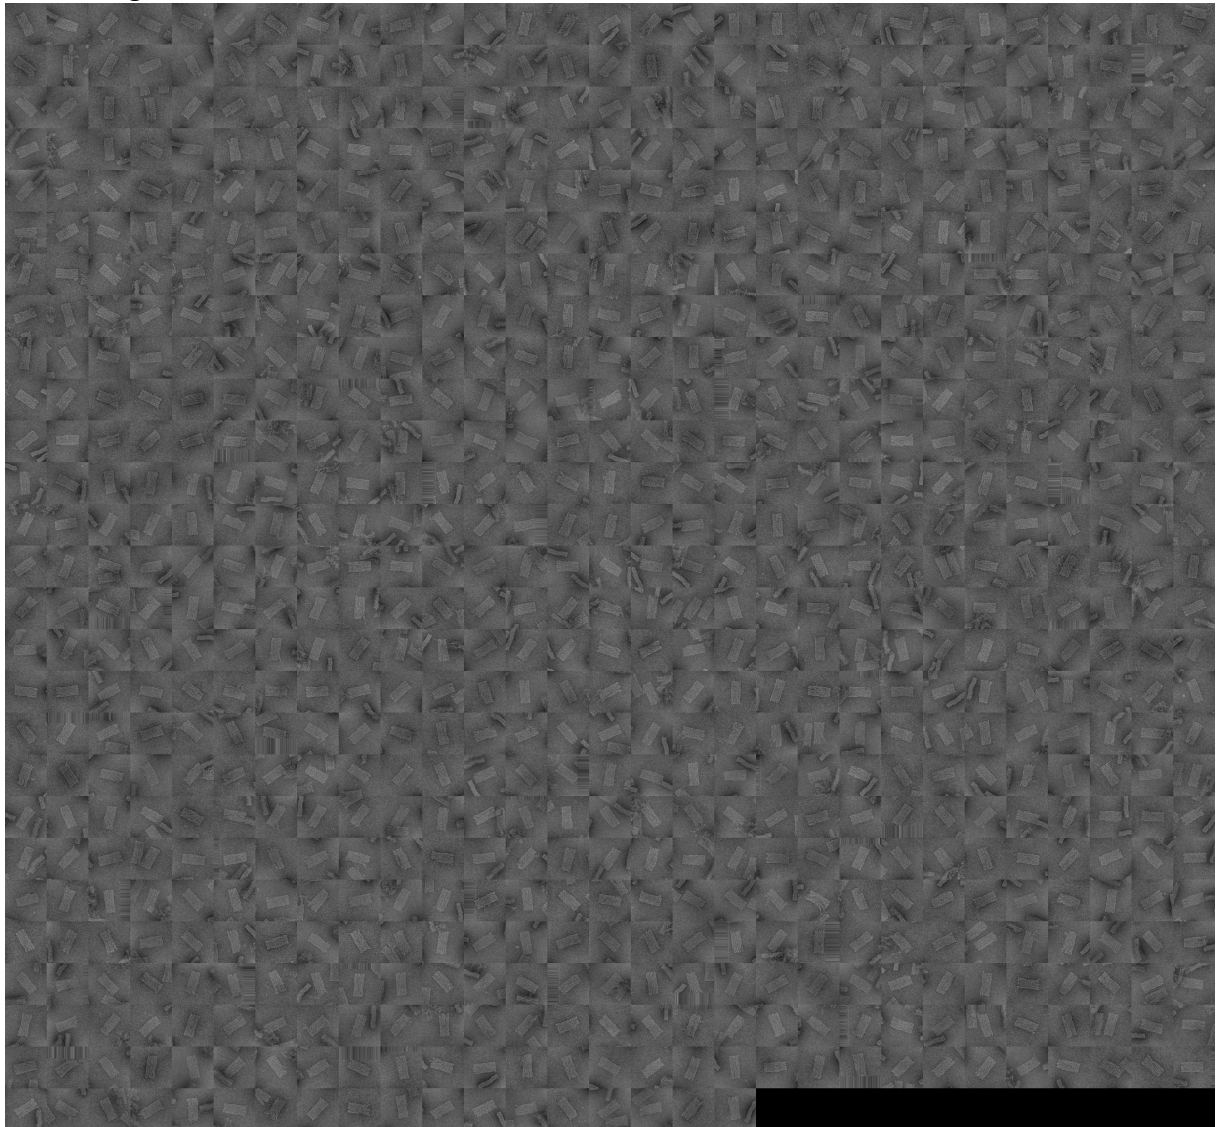

With 4 IgGs bound

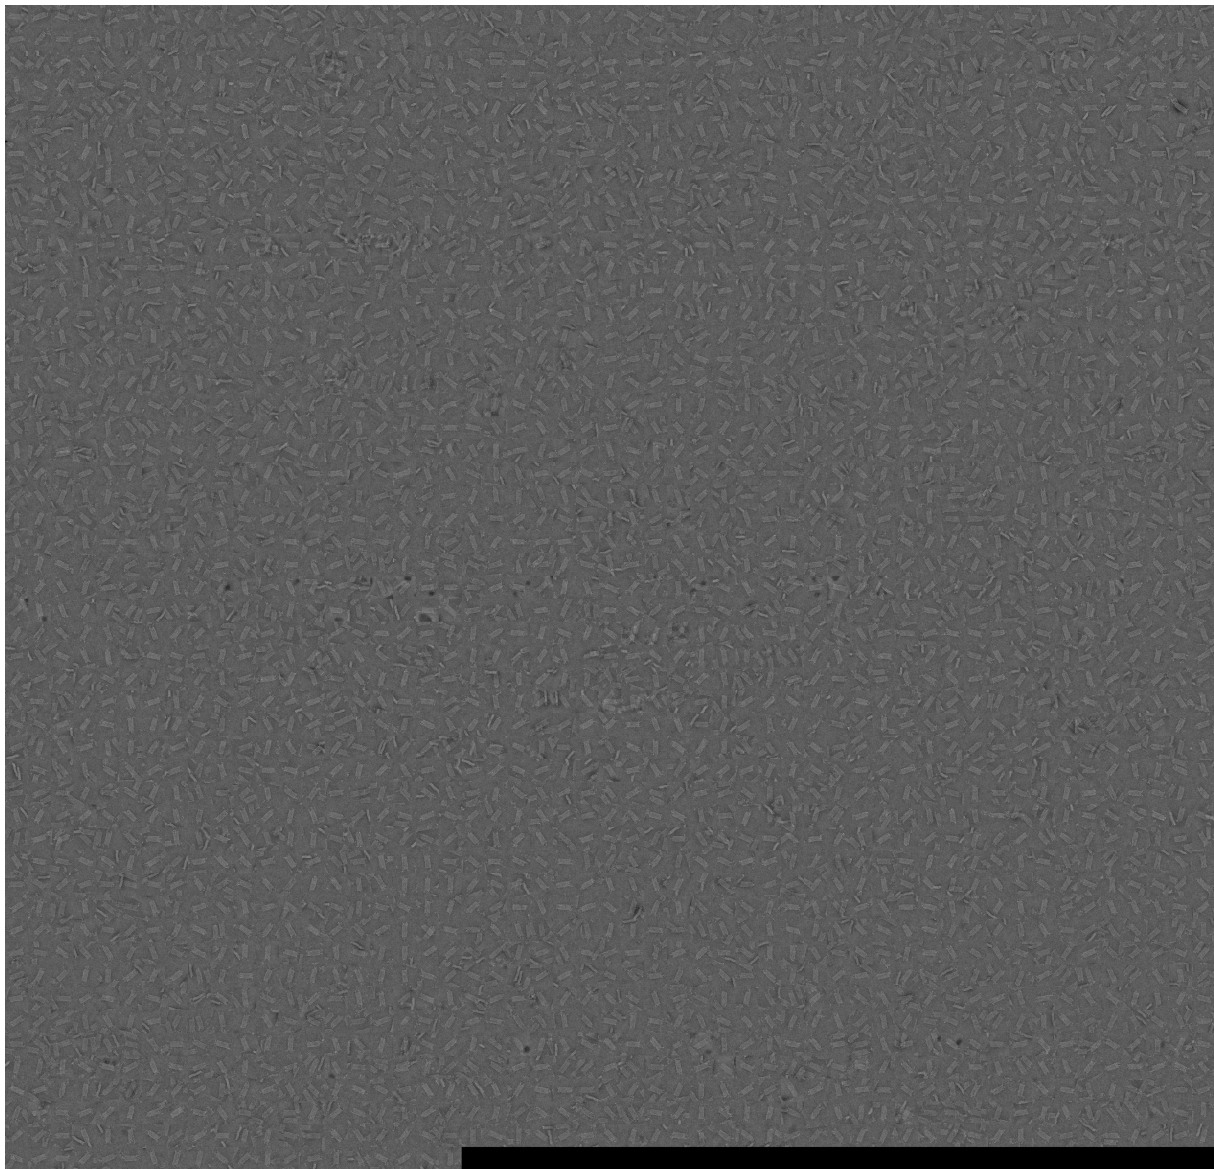

**Source Data Figure 1b:**

Gel data in the main figure is a merge of 7 individual gels with reference markers (scaffold band only) on each gel for alignment.

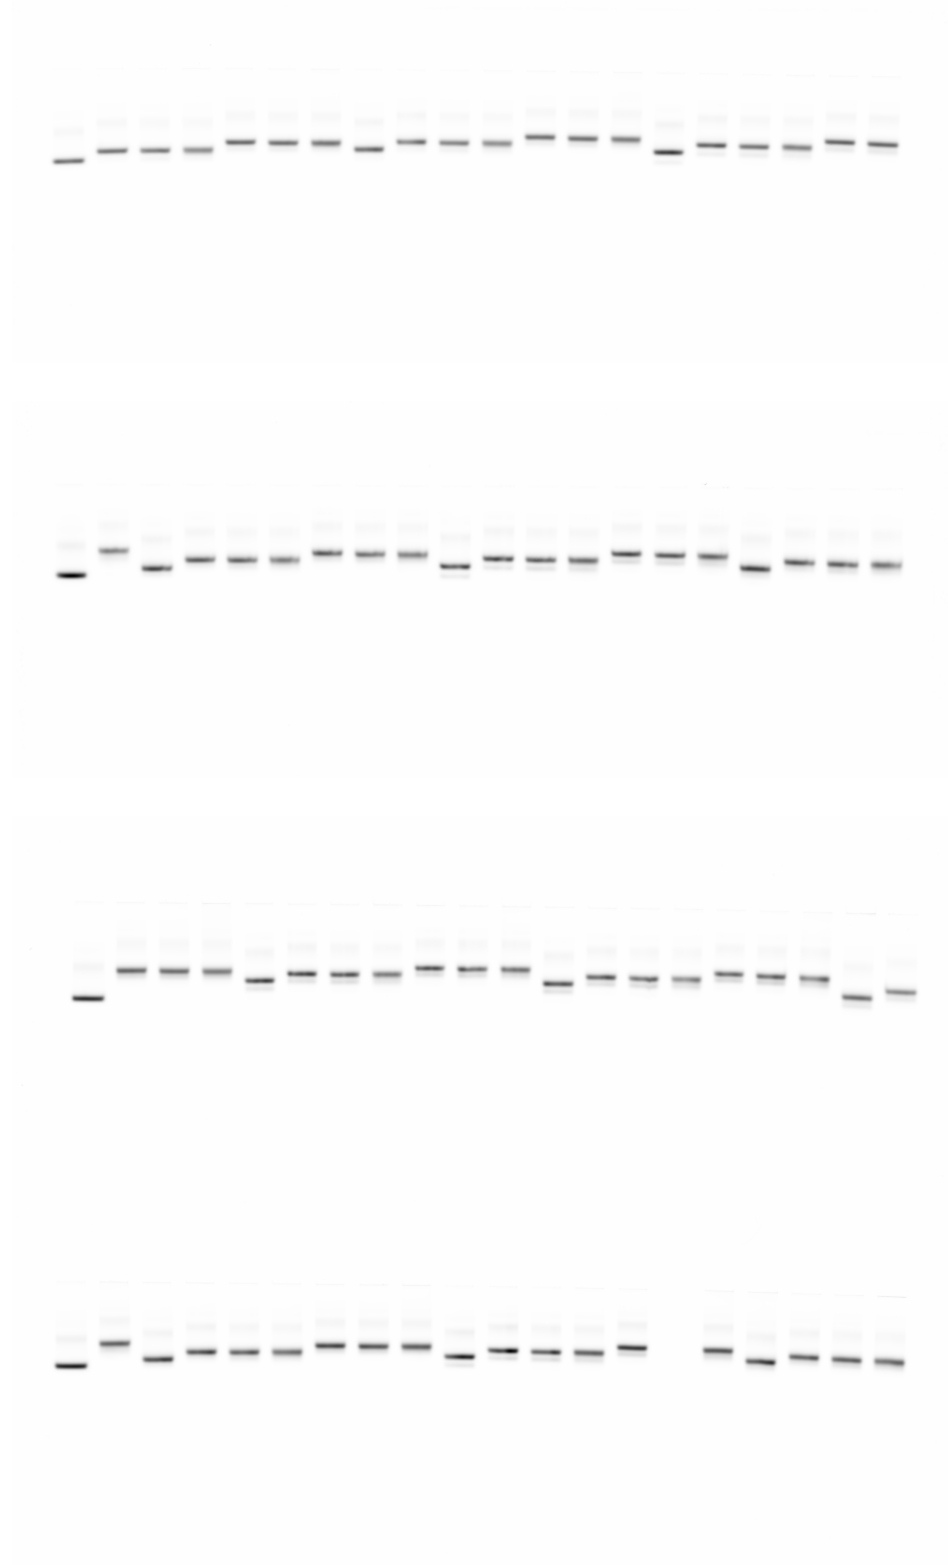

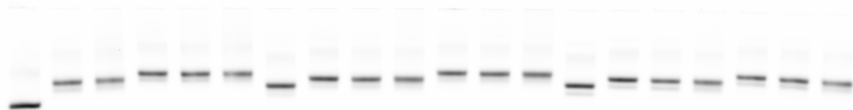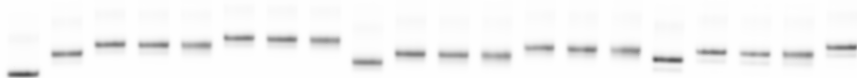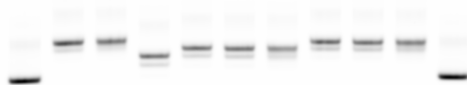

**Source Data Figure 2b:**  
Unprocessed TEM images

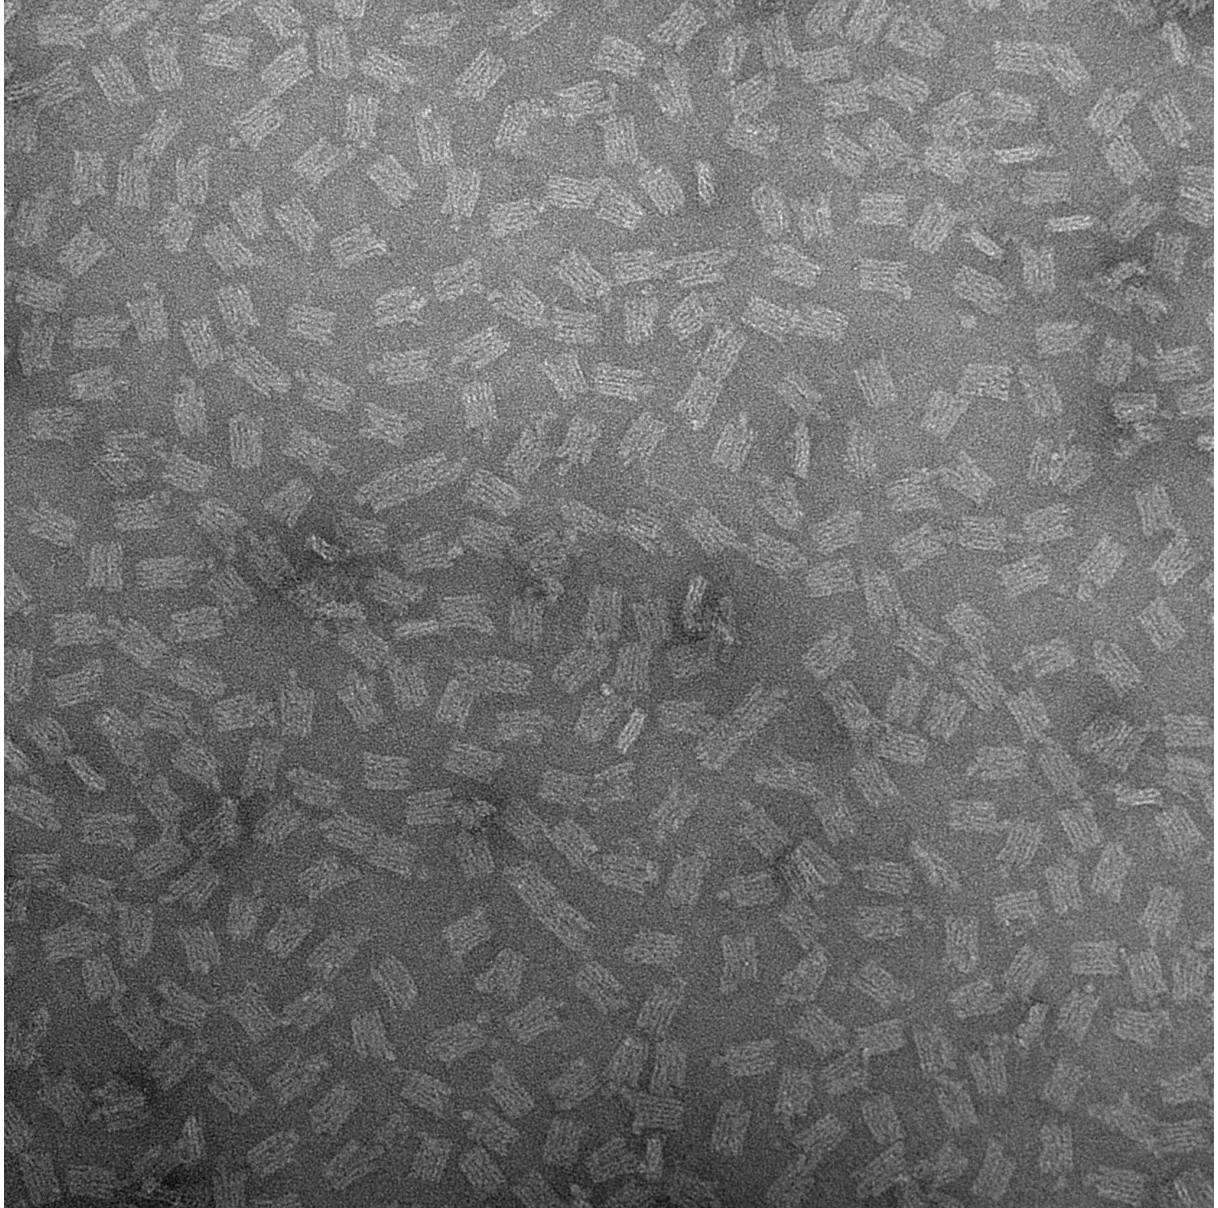

211121.3LP.only018  
Cal: 0.249688 nm/pix  
10:37:44 a 11/21/21  
TEM Mode: Imaging

100 nm  
HV=100.0kV  
Direct Mag: 52000x

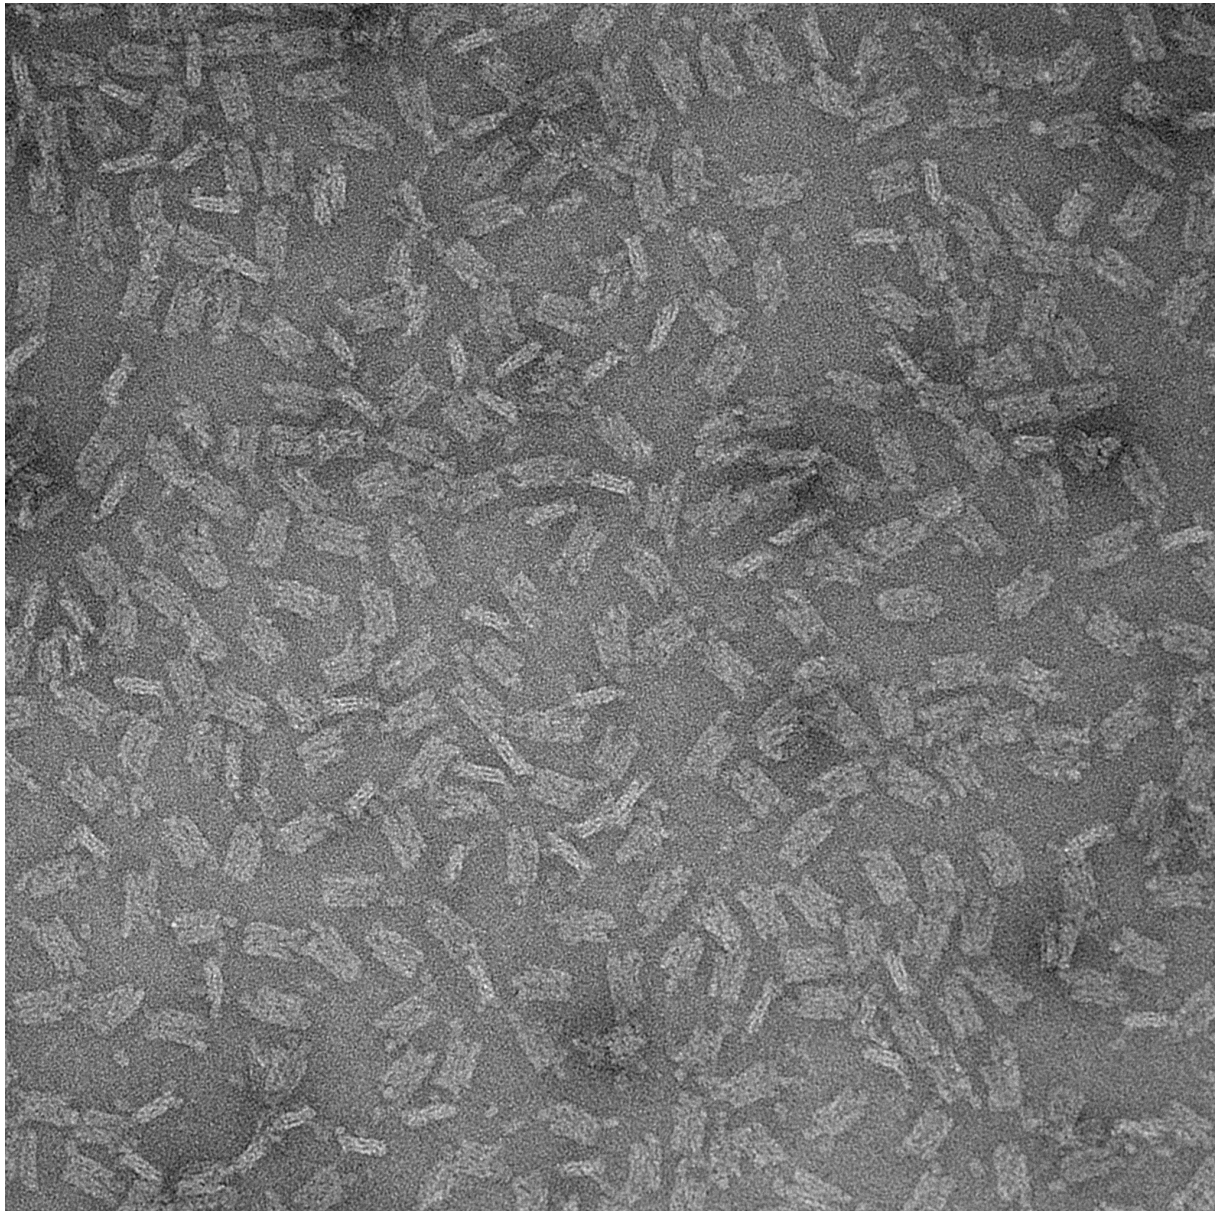

211121.3LP-1.2017  
Cal: 0.249688 nm/pix  
11:23:18 a 11/21/21  
TEM Mode: Imaging

100 nm  
Direct Mag: 52000x

**Source Data Figure 2c:**  
Unprocessed gel image

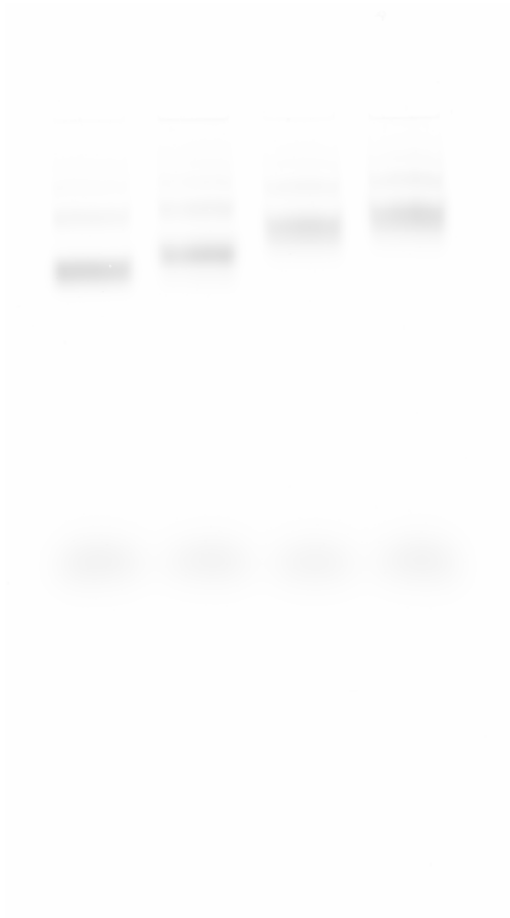

Supplement: 41565_2023_1471_MOESM5_ESM.pdf [file 41565_2023_1471_MOESM5_ESM.pdf]
